# Supplementary material for: Dual control of multi-band resonances with a metal–halide perovskite-integrated terahertz metasurface
Source: Royal Society of Chemistry journal article supplement (doi:10.1039/d2nr00292b), 2022-01-01
Supplement: d2nr00292b1.pdf [file d2nr00292b1.pdf]

## Supporting Information

### Dual control of multi-band resonances with a metal-halide perovskite-integrated terahertz metasurface

Yuying Lu<sup>a,b,g,1</sup>, Tengteng Li<sup>e,1</sup>, Maosheng Yang<sup>c,d</sup>, Haiyun Yao<sup>d</sup>, Lanju Liang<sup>\*d</sup>, Xin Yan<sup>d</sup>, Kai Kai Lv<sup>d</sup>, Meng Wang<sup>d</sup>, Qili Yang<sup>d</sup>, Chaoyang Wei<sup>\*a,b,g</sup>, Jianda Shao<sup>\*b,f,g</sup>, Jianquan Yao<sup>e</sup>

<sup>a</sup> Precision Optical Manufacturing and Testing Centre, Shanghai Institute of Optics and Fine Mechanics, Chinese Academy of Sciences, Shanghai, 201800, PR China. E-mail: siomwei@siom.ac.cn (C. Wei), E-mail: jdshao@siom.ac.cn (J. Shao).

<sup>b</sup> Key Laboratory for High Power Laser Material of Chinese Academy of Sciences, Shanghai Institute of Optics and Fine Mechanics, Shanghai, 201800, PR China

<sup>c</sup> Institute of Micro-nano Optoelectronics and Terahertz Technology and School of Mechanical Engineering, Jiangsu University, Zhen Jiang, 212013, China.

<sup>d</sup> School of Opto-electric Engineering, Zao Zhuang University, Zao Zhuang, 277160, China. E-mail: lianglanju123@163.com (L. Liang)

<sup>e</sup> College of Precision Instruments and Opto-electronics Engineering, Tianjin University, Tianjin, 300072, China.

<sup>f</sup> Hangzhou Institute for Advanced Study, University of Chinese Academy of Sciences, Hangzhou, 310024, PR China

<sup>g</sup> Centre of Material Science and Optoelectronics Engineering, University of Chinese Academy of Sciences, Beijing, 100049, PR China.

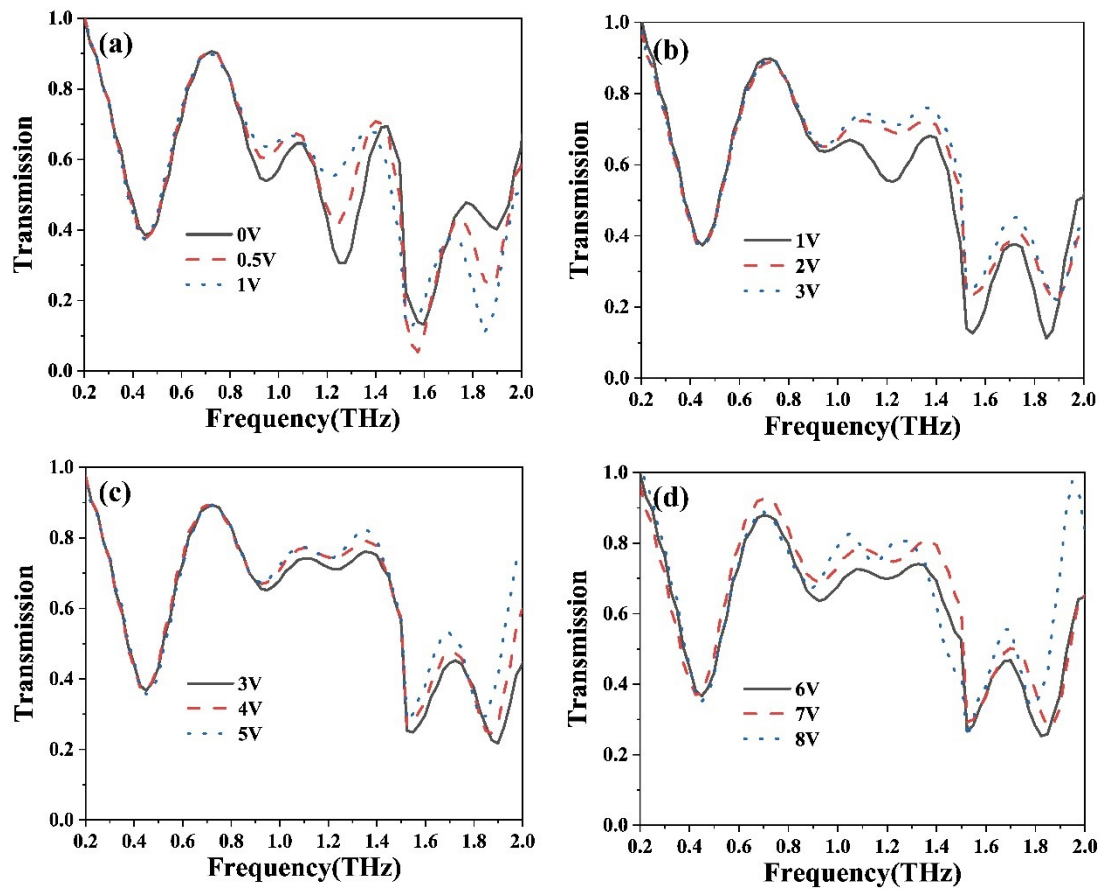

**Fig. S1.** Transmission modulation of higher-order Fano resonances by the electronic method: (a)- (d) Y-polarized electrical modulation, also by tuning the bias voltage from 0 to 8 V.

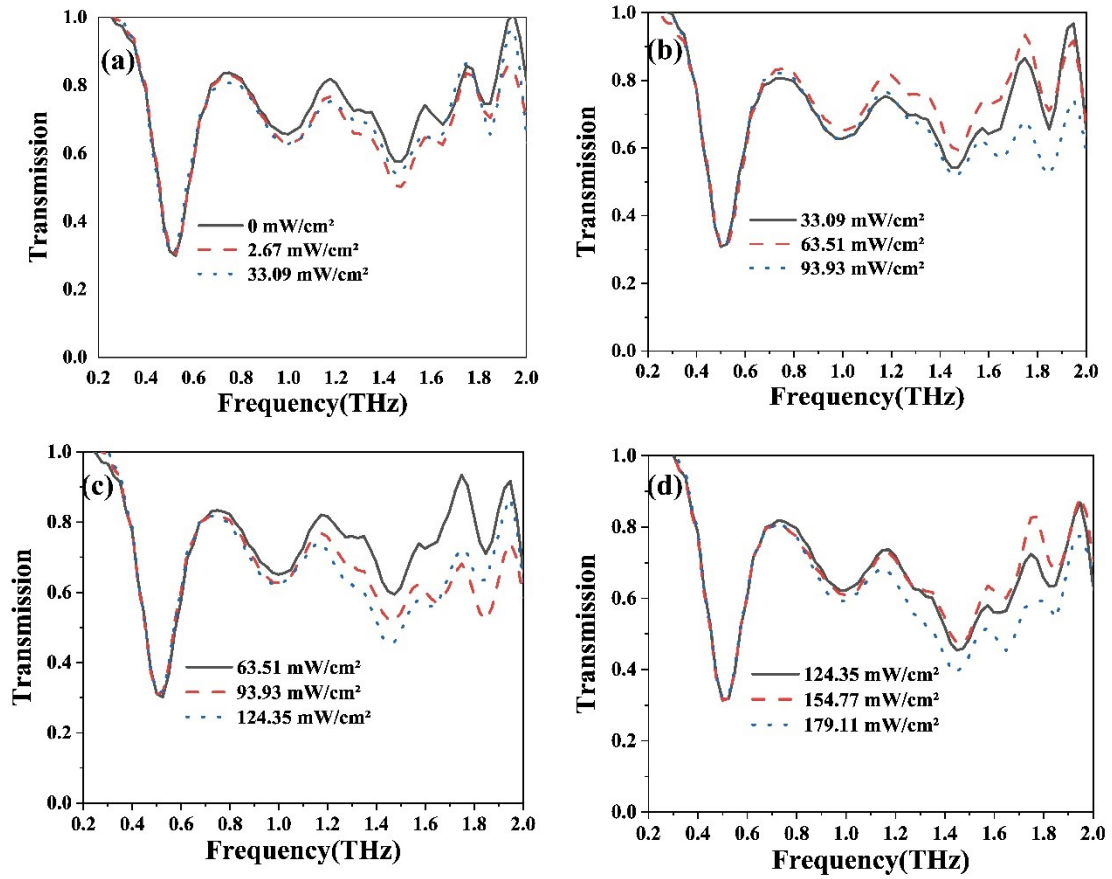

**Fig.S2.** Transmission modulation of higher-order Fano resonances via the optical method: (a)-(d) Y-polarized optical modulation for the optical pump powers from 0 to 179.11 mW/cm<sup>2</sup>.

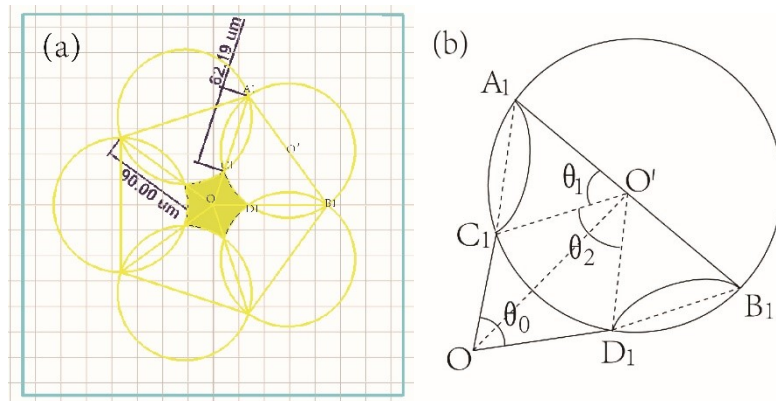

**Fig. S3.** The calculation process of the arcs (a) the macroscopic schematic diagram of the arc  $A_1C_1$  and  $C_1D_1$  (b) the microscopic schematic diagram of the arc  $A_1C_1$  and  $C_1D_1$ .

The coordinate point of O is (0, 0) and the coordinate point of O' is  $(x_0, y_0)$ .

Also,  $OO' = R = 90 \mu\text{m}$ .

In this picture,  $x_0 = R * \cos(\text{rot\_phi}) \approx 27.81 \mu\text{m}$

Here,  $y_0 = R * \sin(rot\_phi) \approx 85.59 \mu m$ .

For  $n=5$ ,  $rot\_deg = 360 / n = 72^\circ$ .

And,  $rot\_phi = rot\_deg * 2 * \pi / 360$ .

We set  $R'' = \frac{A_1 B_1}{2} = D_1 O' = A_1 O'$  and  $R'' = \sqrt{(R - x_0)^2 + y_0^2}$ ,

After calculation, we can gain  $R'' \approx 53.91 \mu m$ ,

By measuring the length of the model of CST software,  $A_1 C_1 = 62.19 \mu m$

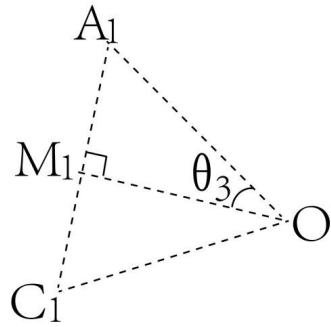

**Fig.S4.** The calculation process of the center angle corresponding to the arcs

For  $\theta_0 = 72^\circ$ , we set  $\theta_1 = 2 * \theta_3 = \angle A_1 O' C_1$ ,

And, we also set  $\theta_2 = \angle C_1 O' D_1$ ;  $\theta_2 + 2\theta_1 = \pi(rad)$ ,

$\theta_3 = \frac{1}{2} * \theta_1$  and  $A_1 M_1 = \frac{1}{2} A_1 C_1 \approx 31.095 \mu m$ .

$\sin \theta_3 = \frac{A_1 M_1}{A_1 O'} = \frac{A_1 M_1}{R''} \approx \frac{31.095}{53.91} = 0.57679$

$\theta_3 \approx \arcsin(0.57679) \approx 0.6148(rad)$ .

$\theta_1 = 2 * \theta_3 = 1.2296(rad)$ .

$\theta_2 = \pi - \theta_1 * 2 = 0.6824(rad)$

Thus, the center angle and radius corresponding to the arc  $A_1 C_1$  are  $53.91 \mu m$  and  $1.2296(rad)$ . While, the center angle and radius corresponding to the arc  $C_1 D_1$  are  $53.91 \mu m$  and  $0.6824(rad)$ . The curvature of these arcs can be more clearly described by arc lengths and radius.

**Table 1.** X-polarized electrical dynamic amplitude and its corresponding frequencies

| Freq/Voltag | F <sub>0x</sub> (THz)/Amp | F <sub>1x</sub> (THz)/Amp | F <sub>2x</sub> (THz)/Amp | F <sub>3x</sub> (THz)/Amp | F <sub>4x</sub> (THz)/Amp |
|-------------|---------------------------|---------------------------|---------------------------|---------------------------|---------------------------|
| e           |                           |                           |                           |                           |                           |
| 0 V         | 0.4495/0.3789             | 0.9490/0.5928             | 1.2237/0.2964             | 1.5734/0.1959             | 1.7732/0.3027             |
| 0.5 V       | 0.4495/0.3859             | 0.9490/0.5725             | 1.2487/0.2248             | 1.5734/0.3598             | 1.7482/0.3976             |
| 1 V         | 0.4495/0.3826             | 0.9740/0.6209             | 1.2237/0.4259             | 1.5234/0.1420             | 1.8231/0.1305             |
| 2 V         | 0.4495/0.3730             | 0.9740/0.6514             | 1.2237/0.5916             | 1.5484/0.3701             | 1.8481/0.2573             |
| 3 V         | 0.4495/0.3657             | 0.9240/0.6939             | 1.1988/0.6913             | 1.5234/0.4561             | 1.8231/0.3097             |
| 4 V         | 0.4495/0.3712             | 0.9240/0.6699             | 1.1988/0.6450             | 1.4985/0.4168             | 1.8231/0.2555             |
| 5 V         | 0.4495/0.3673             | 0.9240/0.6982             | 1.1738/0.6928             | 1.4985/0.4829             | 1.7982/0.2732             |
| 7 V         | 0.4495/0.3617             | 0.8991/0.7147             | 1.1238/0.7237             | 1.4485/0.5751             | 1.7482/0.3371             |
| 8 V         | 0.4495/0.3601             | 0.8991/0.7229             | 1.0989/0.7427             | 1.4485/0.5826             | 1.7482/0.3644             |

**Table 2.** X-polarized optical dynamic amplitude and its corresponding frequencies

| Power/mW/cm | G <sub>0x</sub> (THz)/Amp | G <sub>1x</sub> (THz)/Amp | G <sub>2x</sub> (THz)/Amp | G <sub>3x</sub> (THz)/Amp | G <sub>4x</sub> (THz)/Amp |
|-------------|---------------------------|---------------------------|---------------------------|---------------------------|---------------------------|
| 0           | 0.5244/0.3207             | 0.9990/0.6198             | 1.4235/0.4959             | 1.5984/0.5648             | 1.7982/0.6841             |
| 2.67        | 0.4995/0.3224             | 0.9990/0.5735             | 1.4485/0.4580             | 1.5984/0.5224             | 1.8231/0.6054             |
| 33.09       | 0.4995/0.3172             | 0.9990/0.6161             | 1.4485/0.4953             | 1.5984/0.5582             | 1.7982/0.6346             |
| 63.51       | 0.5244/0.3235             | 0.9990/0.6648             | 1.4485/0.5881             | 1.5984/0.6219             | 1.7982/0.6582             |
| 93.93       | 0.4995/0.3147             | 0.9990/0.6554             | 1.4485/0.5920             | 1.5984/0.6489             | 1.7982/0.7193             |
| 124.35      | 0.4995/0.3228             | 0.9990/0.6324             | 1.4485/0.5196             | 1.5984/0.5709             | 1.7982/0.6422             |
| 154.77      | 0.4995/0.3222             | 0.9990/0.6408             | 1.4485/0.5106             | 1.5984/0.5795             | 1.7982/0.6652             |
| 179.11      | 0.5244/0.3187             | 0.9990/0.6628             | 1.4485/0.5926             | 1.5984/0.6635             | 1.7982/0.7132             |

**Table 3. X-polarized electrical dynamic calculated MD and its corresponding frequencies**

| Freq/Voltage | F <sub>0x</sub> (THz)/MD(%) | F <sub>1x</sub> (THz)/<br>MD(%) | F <sub>2x</sub> (THz)/<br>MD(%) | F <sub>3x</sub> (THz)/<br>MD(%) | F <sub>4x</sub> (THz)/<br>MD(%) |
|--------------|-----------------------------|---------------------------------|---------------------------------|---------------------------------|---------------------------------|
| 0 V          | 0.4495/0                    | 0.9490/0                        | 1.2237/0                        | 1.5734/0                        | 1.7732/0                        |
| 0.5 V        | 0.4495/1.847                | 0.9490/-3.42                    | 1.2487/-24.15                   | 1.5734/83.66                    | 1.7482/31.35                    |
| 1 V          | 0.4495/0.976                | 0.9740/4.74                     | 1.2237/43.69                    | 1.5234/-27.51                   | 1.8231/-56.88                   |
| 2 V          | 0.4495/-1.55                | 0.9740/9.88                     | 1.2237/99.59                    | 1.5484/88.92                    | 1.8481/-14.99                   |
| 3 V          | 0.4495/-3.48                | 0.9240/17.05                    | 1.1988/133.23                   | 1.5234/132.82                   | 1.8231/2.31                     |
| 4 V          | 0.4495/-2.03                | 0.9240/13                       | 1.1988/117.61                   | 1.4985/112.76                   | 1.8232/-15.59                   |
| 5 V          | 0.4495/-3.061               | 0.9240/17.78                    | 1.1738/133.73                   | 1.4985/146.50                   | 1.7982/-9.74                    |
| 7 V          | 0.4495/-4.53                | 0.8991/20.56                    | 1.1238/144.16                   | 1.4485/193.56                   | 1.7482/11.36                    |
| 8 V          | 0.4495/-4.96                | 0.8991/21.94                    | 1.0989/150.57                   | 1.4485/197.39                   | 1.7482/20.38                    |
| MD range(%)  | 6.807                       | 25.36                           | 174.72                          | 224.9                           | 77.26                           |

**Table 4. X-polarized optical dynamic calculated MD and its corresponding frequencies**

| Freq/Power                   | G <sub>0x</sub> (THz)/MD(%) | G <sub>1x</sub> (THz)/ MD(%) | G <sub>2x</sub> (THz)/<br>MD(%) | G <sub>3x</sub> (THz)/<br>MD(%) | G <sub>4x</sub> (THz)/<br>MD(%) |
|------------------------------|-----------------------------|------------------------------|---------------------------------|---------------------------------|---------------------------------|
| 0<br>mW/cm <sup>2</sup>      | 0.5244/0                    | 0.9990/0                     | 1.4235/0                        | 1.5984/0                        | 1.7982/0                        |
| 2.67<br>mW/cm <sup>2</sup>   | 0.4995/0.53                 | 0.9990/-7.47                 | 1.4485/-7.64                    | 1.5984/-7.50                    | 1.8231/-11.50                   |
| 33.09<br>mW/cm <sup>2</sup>  | 0.4995/-1.09                | 0.9990/-0.59                 | 1.4485/-0.12                    | 1.5984/-1.168                   | 1.7982/-7.23                    |
| 63.51<br>mW/cm <sup>2</sup>  | 0.5244/0.87                 | 0.9990/7.26                  | 1.4485/18.59                    | 1.5984/10.10                    | 1.7982/-3.78                    |
| 93.93<br>mW/cm <sup>2</sup>  | 0.4995/-1.87                | 0.9990/5.74                  | 1.4485/19.37                    | 1.5984/14.89                    | 1.7982/0.7193                   |
| 124.35<br>mW/cm <sup>2</sup> | 0.4995/0.65                 | 0.9990/2.03                  | 1.4485/4.77                     | 1.5984/1.08                     | 1.7982/5.14                     |
| 154.77<br>mW/cm <sup>2</sup> | 0.4995/0.46                 | 0.9990/3.38                  | 1.4485/2.96                     | 1.5984/2.60                     | 1.7982/-2.76                    |
| 179.11<br>mW/cm <sup>2</sup> | 0.5244/-0.62                | 0.9990/6.93                  | 1.4485/19.49                    | 1.5984/17.47                    | 1.7982/4.25                     |
| MD range(%)                  | 2.74                        | 14.73                        | 27.13                           | 24.97                           | 16.64                           |



**Table 5. X-polarized electrical dynamic calculated frequency shifts and their corresponding frequencies**

| Freq/Voltage | F <sub>0x</sub> (THz)/frequency shift(GHz) | F <sub>1x</sub> (THz)/frequency shift(GHz) | F <sub>2x</sub> (THz)/frequency shift(GHz) | F <sub>3x</sub> (THz)/frequency shift(GHz) | F <sub>4x</sub> (THz)/ frequency shift(GHz) |
|--------------|--------------------------------------------|--------------------------------------------|--------------------------------------------|--------------------------------------------|---------------------------------------------|
| 0 V          | 0.4495/0                                   | 0.9490/0                                   | 1.2237/0                                   | 1.5734/0                                   | 1.7732/0                                    |
| 0.5 V        | 0.4495/0                                   | 0.9490/0                                   | 1.2487/25                                  | 1.5734/0                                   | 1.7482/-25                                  |
| 1 V          | 0.4495/0                                   | 0.9740/25                                  | 1.2237/0                                   | 1.5234/-50                                 | 1.8231/49.9                                 |
| 2 V          | 0.4495/0                                   | 0.9740/25                                  | 1.2237/0                                   | 1.5484/-25                                 | 1.8481/74.9                                 |
| 3 V          | 0.4495/0                                   | 0.9240/-25                                 | 1.1988/-24.9                               | 1.5234/-50                                 | 1.8231/49.9                                 |
| 4 V          | 0.4495/0                                   | 0.9240/-25                                 | 1.1988/-24.9                               | 1.4985/-74.9                               | 1.8231/49.9                                 |
| 5 V          | 0.4495/0                                   | 0.9240/-25                                 | 1.1738/-49.9                               | 1.4985/-74.9                               | 1.7982/25                                   |
| 7 V          | 0.4495/0                                   | 0.8991/-49.9                               | 1.1238/-99.9                               | 1.4485/-124.9                              | 1.7482/-25                                  |
| 8 V          | 0.4495/0                                   | 0.8991/-49.9                               | 1.0989/-124.8                              | 1.4485/-124.9                              | 1.7482/-25                                  |
| Shift Range  | 0                                          | 74.9                                       | 149.8                                      | 124.9                                      | 99.9                                        |
| (GHz)        |                                            |                                            |                                            |                                            |                                             |

**Table 6. X-polarized optical dynamic calculated frequency shifts and their corresponding frequencies**

| Freq/Optical              | $G_{0x}$ (THz)<br>/frequency<br>shift(GHz) | $G_{1x}$ (THz)<br>/frequency<br>shift(GHz) | $G_{2x}$ (THz)<br>/frequency<br>shift(GHz) | $G_{3x}$ (THz)<br>/frequency<br>shift(GHz) | $G_{4x}$ (THz)/<br>/frequency<br>shift(GHz) |
|---------------------------|--------------------------------------------|--------------------------------------------|--------------------------------------------|--------------------------------------------|---------------------------------------------|
| 0 mW/cm <sup>2</sup>      | 0.5244/0                                   | 0.9990/0                                   | 1.4235/0                                   | 1.5984/0                                   | 1.7982/0                                    |
| 2.67 mW/cm <sup>2</sup>   | 0.4995/-24.9                               | 0.9990/0                                   | 1.4485/25                                  | 1.5984/0                                   | 1.8231/24.9                                 |
| 33.09 mW/cm <sup>2</sup>  | 0.4995/-24.9                               | 0.9990/0                                   | 1.4485/25                                  | 1.5984/0                                   | 1.7982/0                                    |
| 63.51 mW/cm <sup>2</sup>  | 0.5244/0                                   | 0.9990/0                                   | 1.4485/25                                  | 1.5984/0                                   | 1.7982/0                                    |
| 93.93 mW/cm <sup>2</sup>  | 0.4995/-24.9                               | 0.9990/0                                   | 1.4485/25                                  | 1.5984/0                                   | 1.7982/0                                    |
| 124.35 mW/cm <sup>2</sup> | 0.4995/-24.9                               | 0.9990/0                                   | 1.4485/25                                  | 1.5984/0                                   | 1.7982/0                                    |
| 154.77 mW/cm <sup>2</sup> | 0.4995/-24.9                               | 0.9990/0                                   | 1.4485/25                                  | 1.5984/0                                   | 1.7982/0                                    |
| 179.11 mW/cm <sup>2</sup> | 0.5244/0                                   | 0.9990/0                                   | 1.4485/25                                  | 1.5984/0                                   | 1.7982/0                                    |
| Shift Range (GHz)         | 24.9                                       | 0                                          | 25                                         | 0                                          | 24.9                                        |

**Table 7. The drawing process of the unit cell for the metasurface**

|              |  |                                                                                                                                                                                                                                                                                                                                                                                                                                                 |
|--------------|--|-------------------------------------------------------------------------------------------------------------------------------------------------------------------------------------------------------------------------------------------------------------------------------------------------------------------------------------------------------------------------------------------------------------------------------------------------|
| <p>Step1</p> |  | <p>First, we make a triangle with <math>R=90 \mu\text{m}</math> as the radius and the center angle of <math>360/n=360/5=72^\circ</math>. Then, we rotate the triangle five times with the Z axis to obtain a regular pentagon. One side of the triangle is parallel to the X axis. Five triangles are combined by Boolean operation (ADD) to obtain Part 1.</p>                                                                                 |
| <p>Step2</p> |  | <p>We took the midpoint of the hypotenuse of the triangle as the center of the circle. Its coordinate point is <math>(x_0, y_0)</math>. We also took the half of the hypotenuse of the triangle as the radius to draw a single circle.</p> <p>The intersection between the two adjacent circles is named as part 2.</p> $x_0 = R * \cos(\text{rot\_phi}) \approx 27.81 \mu\text{m}$ $y_0 = R * \sin(\text{rot\_phi}) \approx 85.59 \mu\text{m}$ |
| <p>Step3</p> |  | <p>Rotate the single circle in the previous step for five times with the z-axis to obtain Part 3.</p>                                                                                                                                                                                                                                                                                                                                           |
| <p>Step4</p> |  | <p>Add Part 1 and part 3 by Boolean operation to obtain Part 4.</p>                                                                                                                                                                                                                                                                                                                                                                             |
| <p>Step5</p> |  | <p>Subtract Part 4 and part 3 by Boolean operation to obtain Part 5.</p>                                                                                                                                                                                                                                                                                                                                                                        |
| <p>Step6</p> |  | <p>An intersection between two adjacent circles can be obtained as part 2. Add all the Boolean operations of part 2 to obtain part 6.</p>                                                                                                                                                                                                                                                                                                       |
| <p>Step7</p> |  | <p>Part 5 and part 6 are added by Boolean operation to form part 7.</p>                                                                                                                                                                                                                                                                                                                                                                         |

Step 8

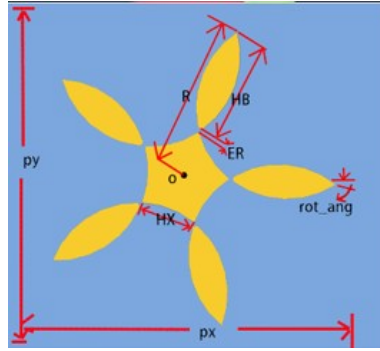

We rotate the obtained metasurface in the counterclockwise direction, In order to achieve the sharpest S-parameters curves at all the resonant frequencies, the rotated angle of the unit cell can be achieved by the scanning function in the CST software. By a lot of simulation process, the optimization goal was achieved when the rot\_angle equals to  $\pi/60(\text{rad})$  in Figure 1.

**The videos for the electric fields of the five resonant frequencies are attached as follows,**

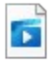

0.61THz.mp4

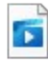

0.8025THz.mp4

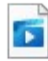

1.03THz.mp4

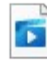

1.4175THz.mp4

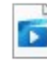

1.5875THz.mp4
